1 **Efficacy of fecal sampling as a gut proxy in the study of chicken gut microbiota**

2

3 **RUNNING TITLE:** Efficacy of fecal sampling as a gut proxy

4

5 Wei Yan<sup>a</sup>, Jiangxia Zheng<sup>a</sup>, Chaoliang Wen<sup>a</sup>, Congliang Ji<sup>b</sup>, Dexiang Zhang<sup>b</sup>, Yonghua Chen<sup>b</sup>,

6 Congjiao Sun<sup>a, #</sup> and Ning Yang<sup>a, #</sup>

7 <sup>a</sup>National Engineering Laboratory for Animal Breeding and MOA Key Laboratory of Animal

8 Genetics and Breeding, College of Animal Science and Technology, China Agricultural University,

9 Beijing, 100193, China

10 <sup>b</sup>Wen's Nanfang Poultry Breeding Co. Ltd, Guangdong Province, Yunfu, 527400, China

11

12 \*Correspondence: Ning Yang, Department of Animal Genetics and Breeding, College of Animal

13 Science and Technology, China Agricultural University, Beijing, 100193, China

14 E-mail: [nyang@cau.edu.cn](mailto:nyang@cau.edu.cn)

15 or Congjiao Sun, Department of Animal Genetics and Breeding, College of Animal Science and

16 Technology, China Agricultural University, Beijing, 100193, China

17 E-mail: [cjsun@cau.edu.cn](mailto:cjsun@cau.edu.cn)

18

19 **ABSTRACT** Despite the convenience and noninvasiveness of fecal sampling, the fecal  
20 microbiota does not fully represent that of the gastrointestinal (GI) tract, and the efficacy of fecal  
21 sampling to accurately represent the gut microbiota in birds is poorly understood. Using chickens  
22 as a model, we collected 1,026 samples from 206 animals, including duodenum, jejunum, ileum,  
23 cecum and feces samples. Most taxa in the small intestine (94.10 – 94.82%) and ceca (99.57%)  
24 could be identified in feces. Microbial community membership was reflected with a gut anatomic  
25 feature, but community structure was not. Excluding shared microbes, the small intestine and ceca  
26 contributed 26.69 and 2.36% of the total fecal members, respectively. The composition of  
27 Firmicutes members in the small intestine and that of Actinobacteria, Bacteroidetes and  
28 Proteobacteria members in ceca could mirrored that observed in fecal samples well ( $\rho = 0.68 -$   
29  $0.79$  and  $0.66 - 0.79$ , respectively,  $P < 0.05$ ). Enterotype-like clustering was performed in GI tract  
30 and all sites were clustered into 2 or 3 enterotype-like clusters. Feces from different clusters  
31 reflected the GI microbiota with different efficacies, giving a new insight into observing efficacy  
32 of feces as a gut proxy. Our results provide evidences that the good potential of feces to identify  
33 most taxa in chicken guts, but microbial structure analyses using feces as a proxy for gut should be  
34 interpreted with caution.

35 **IMPORTANCE** Fecal sample is the important object used in gut microbial study, as the  
36 collection of feces is convenient and noninvasive. It is well known that the microbial community  
37 in fecal sample may not be fully representative of that in gastrointestinal tract (GI), but the extent  
38 to which the fecal sample reflect the microbiota in GI is not fully clear. Instead of focus on the  
39 variation of different sampling sites, this study demonstrated the spatial relationships of  
40 microbiota among duodenum, jejunum, ileum, cecum and feces and partitioned the efficacy of

41 feces as a gut proxy to quantitatively identify the extent to which fecal samples are appropriately

42 used in gut study. Enterotype concept was used to confirm the efficacy of feces as a gut proxy.

43 This work gives insights and provide future directions regarding the usage of fecal samples in

44 studies of the gut microbiome.

45 **KEYWORDS** feces, proxy, gut, spatial relationships, enterotype, chicken

## 46 INTRODUCTION

47 Many studies have reported on the important roles of gut microbiota in affecting host  
48 metabolism and health in humans (1), other mammals (2) and in birds (3). Because of the  
49 convenience and noninvasiveness of fecal sampling, most studies use fecal samples as a proxy to  
50 study the gut microbiota, despite the increasing recognition that fecal microbial populations may  
51 not be fully representative of those in the gastrointestinal (GI) tract contents or mucosa (4, 5).  
52 Therefore, a comprehensive understanding of the efficacy of using fecal samples as a proxy to  
53 study the GI microbiota would help improve longitudinal analyses of microbiota.

54 Among birds, the chicken is frequently used as a research model in research, and its GI  
55 microbiota has been studied previously(6-10). In several studies, the microbiota present in  
56 different GI segments have been investigated using traditional sequencing methods (11) or  
57 high-throughput sequencing techniques (12, 13). However, these studies had small sample sizes  
58 ( $N = 3 - 8$ ) and were primarily aimed at examining the spatial heterogeneity among different  
59 segments and did not focus on the spatial microbiota relationships between feces and the GI tract.

60 Compared with most mammals, the cecum has a specific structure in birds and has been  
61 reported to play important roles in bird metabolism, such as in the digestion of cellulose, starch  
62 and other resistant polysaccharides (14, 15) and in the absorption of nutrients (16) and water (17).  
63 Microbial compositions and functions in chicken ceca have been reported in many studies (18, 19).  
64 In addition, Stanley et al. (20) examined the microbial relationships between the ceca and feces  
65 and observed that 88.55% of all operational taxonomic units (OTUs) were shared. However, the  
66 microbial relationships between the ceca and small intestine (including the duodenum, jejunum  
67 and ileum) were not reported, data which could provide an integrated view of gut microbial

68 relationships.

69 The microbial communities in human feces were previously partitioned into 3 clusters, referred  
70 to as enterotypes (21), which varied from 2 to 3 in subsequent studies in humans (22-24). The  
71 concept was later extended to other mammalian hosts, such as chimpanzees (25) and mice (26).  
72 This concept is rarely used for birds, except in a study on fecal samples from 31 chickens (27).  
73 Thus, enterotype-like clustering was performed in the current study to identify the clusters present  
74 in different sampling sites and help improve our understanding of the microbial relationships  
75 among feces, ceca and small intestine.

76 Using chicken as a model, we performed large-scale sequencing surveys and focused on the  
77 efficacy of using feces to represent the GI microbiota in birds. The efficacy was partitioned into  
78 microbial community membership and structure to gain a comprehensive view concerning this  
79 issue. Using enterotype clustering methods (21), this study reports the enterotype-like clusters in  
80 the duodenum, jejunum, ileum and cecum of birds, improving our understanding of the efficacy of  
81 the use of feces as a proxy to study the gut microbiota and their spatial relationships in the gut.

## 82 **RESULTS**

### 83 **Landscape and quantification of microbial relationships among feces, ceca and small**

84 **intestine.** To gain an overview of the microbial relationships among the chicken duodenum,  
85 jejunum, ileum, ceca and feces, unweighted UniFrac distances (community membership;  
86 presence/absence of taxa) and weighted UniFrac distances (community structure; taking the  
87 relative abundances of taxa into account) were used to perform principal co-ordinates analysis  
88 (PCoA; Fig. 1a, c). The variation in community memberships among different sites were primarily  
89 explained by the sites origin (Fig. 1a), but the community structures showed both the sites origin  
90 and inter-individual variation (Fig. 1c). In particular, the cecal microbial community exhibited a  
91 distant relationship with the small intestine community, and the microbial community in feces  
92 showed an intermediate relationship between those of the ceca and small intestines.

93 UniFrac distances between two samples from all assayed sites within each individual were  
94 calculated to quantify the spatial relationships of the gut microbiota. When the community  
95 membership was considered only, the UniFrac distance decreased along the gut anatomical  
96 locations from the farthest to the nearest sites between fecal and duodenal, jejunal, ileal or cecal  
97 samples (FD, FJ, FI or FC, respectively, in Fig. 1b), presenting clear anatomical differences.  
98 However, when taking the community structure into account, the UniFrac distance increased in FI  
99 and FC compared with that in FJ (Fig. 1d). This finding might be explained by the exchange of  
100 contents between the ileum and ceca, suggesting that the specific cecal microbial structure  
101 influences the microbial communities in the ileum and feces.

102 Among all pairs, the unweighted UniFrac distance between the cecal and duodenal samples was  
103 highest ( $P < 0.05$ ), and that between duodenal and jejunal samples was lowest ( $P < 0.05$ ; Fig. 1b

104 and Table S1). Regarding the weighted UniFrac distances, cecal samples had similar distances to  
105 the duodenal and jejunal samples and were higher than the other pairs ( $P < 0.05$ ), whereas the  
106 lowest distance was observed between duodenal and jejunal samples ( $P < 0.05$ ; Fig. 1d and Table  
107 S1). These results suggest that limited differences exist within small intestinal microbial  
108 communities, while the microbial structure in the ceca is quite distinct from those in the small  
109 intestine.

110 **Analyses of shared and exclusive microbial members.** Given that both the community  
111 membership and structure influence the microbial relationships among the feces, ceca and small  
112 intestine, we next evaluated the extent to which the spatial relationships were influenced by the  
113 above two factors. The shared and exclusive OTUs were calculated to assess the influence of the  
114 microbial community membership. We observed that 1604 OTUs, accounting for 50% of total  
115 OTUs, were shared across all sites (Fig. 2a), and these shared OTUs can be referred to as the “core”  
116 microbiota in the gut. These OTUs represented different proportions of sequences in different sites  
117 and were especially high in fecal samples (98.48%; Fig. 2b), indicating that the most abundant  
118 members detected in fecal samples belonged to these “core” microbiota. At the genus level, these  
119 core taxa were primarily classified as unclassified *Clostridiaceae*, *Lactobacillus*, *Bacteroides*,  
120 unclassified *Bacteroidales* and *Gallibacterium* (Fig. 2c). It is noteworthy that 5.66% of the “core”  
121 microbiota sequences were not assigned and that most of these sequences (71.11%) were detected  
122 in the cecal samples (small pie chart in Fig. 2c), suggesting that most of these unassigned taxa  
123 tended to be anaerobic microbes.

124 Most OTUs in the small intestine (94.1 – 94.82%) and cecal (99.57%) samples could be  
125 identified as fecal OTUs (Table 1), indicating that feces would be an excellent proxy for

126 identifying species in the gut microbiota. However, OTUs from the GI tract that were still present  
127 (5.18 – 5.90% in small intestinal and 0.43% in cecal samples) remained undetected in fecal  
128 samples (Table 1). Of these taxa, *Symbiobacterium*, members of the phylum Chloroflexi and  $\alpha$ -,  $\beta$ -  
129 and  $\gamma$ -Proteobacteria appeared to be particularly undetected feces (Supplementary Table 2).

130 Microbial communities in the small intestine and ceca did not contribute equally to the fecal  
131 microbial members, as 27.01% of fecal OTUs were not identified in cecal samples, most of which  
132 (26.69%) could be identified in small intestinal niches (Table 1 and Fig. 2d). These OTUs were  
133 primarily from the orders *Alteromonadales*, *Bacillales*, *Lactobacillales*, *Actinomycetales*,  
134 *Sphingomonadales* and *Enterobacteriales* (Fig. 2e) and were considered exclusive contributors of  
135 the small intestinal microbiota to fecal microbial members. The ceca exclusively contributed 2.36%  
136 of OTUs to the observed fecal members, representing 0.11% of the fecal sample sequences and  
137 consisting of taxa primarily from the orders *Cenarchaeales*, *Bacteroidales*, *SB-45*, *Chlamydiales*  
138 and *Thermococcales* (Fig. 2f).

139 **Correlation analyses of microbial abundances.** Because community structure also affects the  
140 spatial relationships of gut microbiota, we next performed Spearman correlation analyses between  
141 the mean fecal and segmental genera abundance to evaluate the effects of community structure and  
142 assess the extent to which the microbial community in GI tract was reflected in the fecal samples  
143 (Fig. 3). If a high correlation was observed between two sites, the differences in abundance  
144 between sites were considered highly consistent, so that the abundance at one site had the potential  
145 to be a good proxy for the abundance at another. The microbial composition of feces was  
146 moderately correlated with those in the small intestine (Spearman:  $\rho = 0.43$ ;  $P < 0.05$ ) and in the  
147 combination of small intestine and ceca ( $\rho = 0.50$ ;  $P < 0.05$ ; Fig. 3a). We then performed similar



148 analyses to identify the correlation bias in predominant phyla (Actinobacteria, Bacteroidetes,  
149 Firmicutes and Proteobacteria; Fig. S2). Genera of the Firmicutes and Proteobacteria phyla in  
150 fecal samples showed moderate to high correlations with those in all of four GI sites ( $\rho = 0.43 -$   
151  $0.79, P < 0.05$ ). In particular, fecal samples were highly representative of Firmicutes members in  
152 the small intestine ( $\rho = 0.68 - 0.79, P < 0.05$ ) and of Actinobacteria, Bacteroidetes and  
153 Proteobacteria members in ceca ( $\rho = 0.66 - 0.79, P < 0.05$ ). However, Actinobacteria members in  
154 the small intestine might not be well represented in fecal samples ( $\rho = 0.15 - 0.25, P > 0.05$ ; Fig.  
155 S2).

156 A follow-up question concerned the extent to which each microbe correlated between two sites.  
157 To address this issue, Spearman correlation tests were performed for each genus between two sites.  
158 The genera with abundances of  $> 0.1\%$  at either compared site with a significant correlation ( $P <$   
159  $0.05$ ) are summarized in Fig. S3. Between the fecal and each of the 4 gut segmental samples, a  
160 limited number of significant correlations ( $P < 0.05$ ) were observed, and these correlations were  
161 not high ( $\rho = -0.2 - 0.4, P < 0.05$ ) for each genus. Most genera with significant correlations  
162 belonged to the phyla Firmicutes and Proteobacteria. However, more significant and moderate  
163 correlations were observed between two of the small intestinal segments, and most of the genera  
164 with significant correlations were also from the phyla Firmicutes and Proteobacteria (Table S3).  
165 The results suggest that the gut microbiota structures could be moderately reflected by fecal  
166 samples when taking all genera into consideration simultaneously, but analyses of fluctuations in  
167 abundance for a specific genus should be interpreted with caution.

168 Although microbes at one site were weakly correlated with the corresponding microbes at  
169 another site, certain patterns were observed in some cases, as exemplified by the genus

170 *Campylobacter* (Table S3). The abundance of this genus in ceca exhibited consistent correlations  
171 with that observed in the jejunum ( $\rho = 0.21$ ,  $P < 0.05$ ) and ileum ( $\rho = 0.36$ ,  $P < 0.05$ ). In ileal  
172 samples, this genus was correlated with that measured in fecal samples ( $\rho = 0.19$ ,  $P < 0.05$ ), while  
173 no correlation was observed between cecal and fecal samples. This finding indicates that  
174 *Campylobacter* has great colonization ability in the distal gut of chickens, especially in ceca, and  
175 most *Campylobacter* contributions to the fecal composition are probably from the ileum, but not  
176 ceca.

177 **Enterotype clustering analyses.** The above analyses showed the spatial relationships of the gut  
178 microbiota among chicken feces, ceca and small intestine by regarding each site as an entirety, and  
179 the “entirety” could be clustered into different enterotype-like groups (21), which might improve  
180 our observations. To address this issue, enterotype analyses of different sites were implemented  
181 using the methods reported by Arumugam et al. (21).

182 The microbial communities in the duodenum, jejunum and ceca were clustered into two clusters,  
183 while those in ileum and feces were clustered into three (Fig. 4a). Each of the clusters was  
184 characterized by signature taxa that were overrepresented in one cluster compared to their  
185 representation in the others within each site. The signature taxa of clusters in different sites  
186 presented different but anatomy-linked features (Fig. 4b). In the small intestine, *Ochrobactrum*  
187 and *Rhodococcus* were overrepresented in duodenal cluster 1, jejunal cluster 2 and ileal cluster 2.  
188 An unassigned taxon was overrepresented in duodenal cluster 2, jejunal cluster 2 and ileal cluster  
189 2, and this taxon was identified as New.ReferenceOTU2622 based on OTU level analyses. These  
190 signature taxa showed conserved overlaps among clusters within the small intestine. Similarly, the  
191 signature taxa in fecal clusters presented linkages with those in GI clusters. Fecal cluster 1 was

192 overrepresented by unclassified *Clostridiaceae*, which also occurred in jejunal cluster 1 and ileal  
193 cluster 1. *Bacteroides* was overrepresented in fecal cluster 2, as well as in ileal cluster 4 and cecal  
194 cluster 1. However, *Gallibacterium* and *Lactobacillus* were overrepresented in fecal cluster 3,  
195 which did not occur any of the GI clusters (Fig. 4b).

196 To understand whether enterotype-like clustering would affect the spatial relationships of gut  
197 microbiota, individual animals were divided into 3 groups according to the fecal enterotype-like  
198 clusters (Enterotype-like clusters 1, 2 and 3, F1, F2 and F3). Within each group, the UniFrac  
199 distances between feces and each of four GI segments were calculated, and each distance was  
200 compared among three groups. The results showed that both the community membership  
201 (unweighted UniFrac distance) and structure (weighted UniFrac distance) were associated with the  
202 enterotype-like clustering (Fig. 5). Although membership was not significantly affected by the  
203 clustering between F1 and F3, fecal samples in F2 exhibited a higher membership similarity with  
204 cecal samples but a lower similarity with small intestine samples than the other two cluster groups  
205 (Fig. 5a). Regarding community structure, fecal samples in F2 also exhibited a higher similarity  
206 with cecal samples than the other two groups. Nevertheless, similarities between fecal samples and  
207 each of the GI segments were lower in F1 than in F2 and F3 (Fig. 5b). The results suggested that  
208 the fecal microbial community in F2 might be influenced by cecal microbiota and be more  
209 representative of the cecal microbial community. Furthermore, the fecal samples in F1 had  
210 reduced abilities to reflect the microbial community structure of the GI tract.

211 Spearman correlation analyses at the genus level were performed to assess the extent to which  
212 GI communities were reflected by fecal samples in different fecal clusters. All three enterotype  
213 groups presented moderate correlations between fecal and GI samples (Fig. 3b-d), and the

214 correlations were consistent with the results in comparisons of the weighted UniFrac distance, as  
215 shown in Fig. 5b, confirming the microbial relationships between feces and GI tract among three  
216 enterotype groups. To assess the correlation bias in the abundant phyla (Actinobacteria,  
217 Bacteroidetes, Firmicutes and Proteobacteria), we next performed similar correlation analyses  
218 between feces and each of the GI segments within each fecal cluster and specific phylum, and the  
219 distribution of correlations is shown in Fig. S4. Fecal samples in all three groups showed  
220 correlations with corresponding cecal samples ( $\rho = 0.36 - 0.84$ ,  $P < 0.05$ ) in all four phyla. In  
221 particular, F2 showed high correlations ( $\rho = 0.69 - 0.84$ ,  $P < 0.05$ ) between fecal and cecal  
222 samples, confirming the close relationships between these two sites in F2. In the phylum  
223 Actinobacteria, most correlations between fecal and small intestine samples in both F1 and F3  
224 were low or not significant ( $\rho = 0.34$ ,  $P < 0.05$ ). In the phylum Firmicutes, fecal samples in F2  
225 and F3 were highly correlated with small intestine samples ( $\rho = 0.66 - 0.83$ ,  $P < 0.05$ ). The results  
226 provide additional evidence that the enterotype-like clustering influences the efficacy of fecal  
227 sampling for studying gut microbial communities.

## 228 **DISCUSSION**

229 **The efficacy of using fecal samples to reflect the gastrointestinal microbiota.** To our  
230 knowledge, this is the first large-scale sequencing assessment on the efficacy of using fecal  
231 samples as a proxy for the gut microbiota in birds. In this study, we comprehensively examined  
232 the membership, structure and enterotype-like clusters of the chicken gut microbiome at five  
233 different biogeographic sites within 206 individual animals. We showed that fecal samples were  
234 good proxies for detecting the presence/absence of GI microbial members because most GI tract  
235 members could be detected within anatomic features in fecal samples (microbial communities in  
236 feces showed increasing similarities to those in the GI tract along the  
237 duodenum-jejunum-ileum-ceca axis). However, phyla bias and inter-individual and  
238 enterotype-like clustering effects were observed to affect the efficacy of using fecal samples to  
239 study GI microbial abundance.

240 Similar to the current study, a high proportion of shared OTUs has been previously observed  
241 between fecal and cecal samples in chickens (20). Similarly, a study in house mice observed that  
242 93.3% of OTUs were shared between fecal and lower GI samples (28). Another chicken study  
243 indicated that the GI origin is a primary determinant for the chicken fecal microbiota composition  
244 (29), supporting the high proportion of shared OTUs between feces and the four gut segments  
245 observed in the current study. These results indicate that fecal samples have good potential for  
246 identifying microbial members derived from the GI tract. However, another chicken study (12)  
247 observed low percentages of shared OTUs between segments. A major reason for the differences  
248 among studies might be the small sample size in Choi's study, which would increase the  
249 sensitivity of the results with respect to individual variation. Moreover, the presence/absence of

250 microbial members in the GI tract was observed to be reflected by fecal samples in a given  
251 anatomical feature, i.e., fecal samples had more similarities in community membership to those in  
252 ileal and cecal samples than in duodenal and jejunal samples, consistent with previous reports in  
253 birds (13) and mammals (28, 30).

254 As for microbial community structure, the efficacy of using fecal samples to represent the gut  
255 microbiota structure did not work as well as for community membership. First, the weighted  
256 UniFrac distances between feces and each of intestinal segments was significantly higher than the  
257 corresponding unweighted UniFrac distances (Fig. S5), suggesting that taking the abundance into  
258 account significantly increased the dissimilarity between feces and each of the GI segments.  
259 Second, the abundances of most taxa were significantly different between fecal and GI samples  
260 (Table S4), consistent with previous studies(11, 13, 31). Third, the correlations between the mean  
261 fecal and segmental genera abundances were moderate, similar to the results obtained for rhesus  
262 macaques (32). However, these correlations display bias among different phyla, i.e., different  
263 phyla in the GI tract are differentially mirrored by fecal samples. Fourth, significant correlations  
264 ( $P < 0.05$ ) of each microbe between fecal and segmental samples were low and rare, suggesting  
265 that the efficacy of using fecal samples to represent microbial abundance was affected by the  
266 inter-individual effect. A similar effect has also been observed in humans (4).

267 In addition, the efficacy of using fecal samples to represent the gut microbiota was affected by  
268 enterotype-like clustering. In this study, we observed that fecal samples in cluster F2 were more  
269 representative of the cecal microbiota than in F1 and F3. We infer that this phenomenon might be  
270 explained by the greater susceptibility of the fecal microbial community in cluster F2 group to the  
271 cecal microbiota, making the compositions of the microbial community in feces and ceca more

272 identical, e.g., the dominant genus in the cecum and the overrepresented genus in the feces in  
273 cluster F2 was *Bacteroides*. The *Bacteroides* enterotype is broadly observed in fecal samples in  
274 chickens (27), humans (21, 24) and other mammals (25, 26), but the relationships between fecal  
275 and GI samples within this enterotype have been rarely reported. Therefore, more studies are  
276 required to elucidate the enterotype-like clustering effects on the efficacy of using fecal samples to  
277 reflect gut microbial profiles.

278 Previous studies in humans (4, 33) and other mammals (32, 34) have also addressed the issue of  
279 whether fecal samples are good representatives for GI microbial analyses. Although the  
280 conclusions may not be fully consistent, nearly all studies reached a consensus that microbial  
281 communities in fecal samples do not represent the whole GI microbiota. Studies in humans  
282 suggest that microbial communities in the duodenum and colon are not represented by those in  
283 feces because of the large differences in microbial profiles (33), and these studies emphasized the  
284 need to examine tissue biopsies in addition to fecal samples (5), proposing that standard forceps  
285 mucosal biopsy samples can represent bacterial populations (4). Compared with human studies,  
286 studies in other mammals are more comprehensive because a larger number of gut segments can  
287 be involved in the analyses. Several studies in mice (28, 34) support the utility of fecal samples for  
288 studying the gut microbiota, because microbial communities in fecal samples were observed to be  
289 similar to those in the lower GI tract, which is supported by studies conducted in rhesus macaques  
290 (32), pigs (35) and equines (36).

291 Compared with previous studies, the strength of the current study lies in the following: 1) it  
292 involved the use of gut segments from the upper GI tract to the lower GI tract and feces, providing  
293 a relatively comprehensive view of the spatial relationships of the gut microbiota; 2) the microbial

294 relationships were partitioned into two parts, i.e., microbial community membership and structure,  
295 providing multi-angle observations to identify microbial relationships between feces and the GI  
296 tract; 3) a massive number of individuals was sampled, which is significant for investigations of  
297 gut spatial relationships, as the sizes of most of the above studies did not exceed twenty; and 4) the  
298 use of enterotype-like clustering analyses provided new insights into exploring the utility of fecal  
299 samples in studies of the gut microbiota.

300 **Specific roles of the cecal microbial community in the gut.** Because of the specific and  
301 significant roles in nutrition and health (15, 37), ceca have been widely investigated in birds (38,  
302 39), especially chickens (18, 19, 40). *Bacteroides* was observed as the dominant taxa in our sturdy  
303 (Fig. S6) and in most other studies (41, 42), although some reports observed a predominance of  
304 *Clostridiales* members in ceca (12, 43). Although the cecal microbial community may sometimes  
305 be linked to diet (38), the nearly consistent results across studies suggests the cecal microbial  
306 community is stable. This finding might be due to ceca having a special blind-ended structure and  
307 are located in the lower GI tract, providing a stable and anaerobic environment for microbes and  
308 longer storage periods of the contents, in contrast to the rapid transit environment in the small  
309 intestine (44). In addition to the microbial composition, Stanley et al. (20) also compared  
310 microbial differences and similarities between ceca and feces in chicken. They observed that 88.55%  
311 of all OTUs, containing 99.25% of all sequences, were shared by the ceca and feces, similar to the  
312 observations in the current study. These results indicate that except for some rare microbial  
313 members, most microbes in the ceca can be detected in fecal samples.

314 The microbial relationships between the ceca and small intestine have been rarely reported in  
315 birds. Choi et al. (12) compared the percentage of shared OTUs among ceca and three small



316 intestinal sections but observed low percentages between the segments (ranging from 1.2 to 2.9%,  
317 representing from 38.7 to 65.5% of sequences). The percentages reported in another study (60.2%  
318 for the duodenum, 50.5% for the jejunum and 43.5% for the ileum, which were calculated from  
319 Fig. 3 in their article) were higher than those in Choi's study. In contrast, the results of Xiao's  
320 study presented an opposite trend from our findings, i.e., the percentages of shared OTUs in  
321 Xiao's study decreased from the duodenum to the jejunum and ileum, demonstrating a  
322 reversed-anatomical feature compared with the current study. These inconsistent results might be  
323 attributable to differences among species, diets or other environmental factors, but the small  
324 sample size in Xiao's study may be an important reason for these inconsistencies.

325 **Enterotype-like clustering in chicken gut microbiota.** Enterotype-like clustering is of  
326 increasing concern and has recently led to heated discussions (45, 46). To the best of our  
327 knowledge, the current study describes the first attempt of enterotype-like clustering for the GI  
328 tract of birds. Three enterotype-like clusters (*Ochrobactrum*, *Rhodococcus* and  
329 New.ReferenceOTU2622) appeared to be conserved in the small intestine, demonstrating a close  
330 microbial relationship within the small intestine. Additionally, the enterotype-like cluster  
331 *Bacteroides* and unclassified *Clostridiaceae* appeared in the jejunum and ileum with the oxygen  
332 concentration, pH and nutrient changes along the GI tract. Both New.ReferenceOTU2622 clusters  
333 in the duodenum and ileum had a lower diversity than the corresponding clusters (Fig. S7),  
334 suggesting a potential depression role of this taxon compared to many other microbes. Cecal  
335 samples were clustered into two enterotype-like clusters, but the silhouette coefficient was low  
336 (0.08, Fig. S1f). This issue might be attributable to similar dominant genera (*Bacteroides*,  
337 unclassified *Bacteroidales* and unclassified *Clostridiales*) in both enterotype-like clusters, such

338 that the similarity between the two clusters was high (ADONIS:  $R^2 = 0.021$ ,  $P < 0.05$ ; Fig. S6).  
339 Similarly, the clustering in ceca did not significantly lead to a difference in microbial diversity  
340 (Fig. S7). These results also provided evidence that the microbial community in ceca tended to be  
341 more stable than other GI segments.

342 The chicken fecal samples were previously clustered into four potential enterotypes: enterotype  
343 1, dominated by Firmicutes; enterotype 2, dominated by Firmicutes and Proteobacteria; enterotype  
344 3, dominated by Firmicutes and Actinobacteria; and enterotype 4, dominated by Firmicutes and  
345 Bacteroidetes (27). This result is not fully consistent with the enterotype-like clusters observed in  
346 our study. Regarding cluster numbers, Kaakoush et al. (27) observed four potential enterotypes,  
347 while we observed three. At the phylum level, the clusters in our study were overrepresented by  
348 Firmicutes, Bacteroidetes and Proteobacteria, but not Actinobacteria. At the genus level, the  
349 *Lactobacillus* and *Bacteroides* clusters were observed in both Kaakoush's and our studies, despite  
350 differences in the species, environment and sample size. This finding indicates that *Lactobacillus*  
351 and *Bacteroides* clusters have the potential to be conserved clusters in chickens. The *Lactobacillus*  
352 cluster would account for the largest microbial proportion (53.0% in our study) in fecal samples,  
353 because *Lactobacillus* has been widely reported as the dominant genus in the feces of domestic  
354 poultry (29, 47) and pet birds (48). Because microbial diversity is linked to the stability of the  
355 microbial community (49, 50), the community in the *Bacteroides* cluster has the potential to be  
356 more stable with a higher diversity than in other fecal clusters ( $P < 0.001$ ; Fig. S7). However, the  
357 results are not fully consistent across studies in chickens (27), humans (23, 45) and mammals (26,  
358 46), suggesting that the relationship between enterotype-like clustering and microbial diversity  
359 might be influenced by differences in species, cohorts within species and the environment.

360 In humans, an enterotype classifier with a flow that includes two routes to obtain enterotype  
361 assignments has been developed (45). We applied the classifier to our dataset, and none of the  
362 duodenum, jejunum, ileum and feces samples were similar to stool samples from large-scale  
363 projects, such as MetaHIT and HMP. In ceca, 71 samples matched the classifier sample criteria,  
364 and most were clustered as enterotype *Bacteroides*, consistent with the current study (data not  
365 shown). Differences in the physiological structure of the GI tract (e.g., the short colon with  
366 numerous flat villi and relatively few goblet cells) (51), diet and the environment between humans  
367 and birds make this enterotype classifier not fully suitable for data collected from birds, making it  
368 necessary to develop an enterotype classifier for birds in the future that can be used to gain a better  
369 understanding of their gut microbiota and to detect disorders.

370 In conclusion, we assessed the efficacy of using fecal samples to represent GI microbiota in  
371 birds and analyzed potential factors affecting this efficacy. With highly shared microbial members,  
372 fecal samples could be used to detect most microbial species in the small intestine and ceca with  
373 gut anatomical features. However, analyses of microbial structures using fecal samples as the  
374 proxy for the gut in longitudinal microbial studies should be interpreted with caution. Moreover,  
375 we described the first attempt to perform enterotype-like clustering in GI segments and observed  
376 that the clustering affected the efficacy of using fecal samples to represent the GI microbiota. This  
377 study is one of the first attempts to identify the microbial relationships between feces and the  
378 intestine in birds, which will help extend our understanding of the bird gut microbiota and provide  
379 future directions regarding the usage of fecal samples in studies of the gut microbiome.

## 380 MATERIALS AND METHODS

381 **Animal model.** The complete procedure was performed according to the guidelines established  
382 by the Animal Care and Use Committee of China Agricultural University (permit number: SYXK  
383 2013-0013).

384 The slow-growing yellow broiler was used as the animal model in this study, and the birds were  
385 obtained from Wen's Nanfang Poultry Breeding Co., Ltd. in Guangdong Province of China. Two  
386 hundred and six birds with similar body weights were selected and raised on the ground with *ad*  
387 *libitum* feeding and nipple drinkers. The birds were fed a common maize-soybean-based diet  
388 throughout the duration of the experiment. No antibiotics were applied during the thirty-five days  
389 before sample collection. Because chickens are the largest population of birds on earth, the  
390 chicken was selected as a bird model for this investigation. The slow-growing yellow broiler has  
391 not been highly selected for production, making this breed of chicken closer to the ancestral birds.

392 **Sample collection.** Fresh fecal samples were collected from each bird as soon as excreta was  
393 discharged through the cloaca at 77 days of age. Next, all the birds were humanely euthanized and  
394 dissected. The contents and mucosal surfaces of the duodenum, jejunum, ileum and cecum were  
395 collected immediately after dissection. To ensure the consistency of samples among individuals, a  
396 10-cm-long fixed section of the duodenum and jejunum, and the whole ileum and a pair of ceca  
397 were selected for sampling from each bird. The contents and mucosa were mixed uniformly before  
398 collection. All samples were immediately placed in liquid nitrogen and then stored at -80°C. Both  
399 the intestinal contents and mucosa were sampled based on the consideration that the microbes  
400 from both sources may contribute to host interactions with respect to nutrient metabolism and  
401 immunity (52).

402     **DNA extraction and 16S rRNA gene sequencing.** DNA was extracted from intestinal and  
403 fecal samples using a QIAamp DNA stool mini kit (QIAGEN, cat#51504) (53) following the  
404 manufacturer's instructions. PCR amplification of the V4–V5 region of the bacterial 16S rRNA  
405 gene was performed using the forward primer 515F (5'-GTGCCAGCMGCCGCGGTAA-3') and  
406 the reverse primer 907R (5'-CCGTCAATTCMTTTRAGTTT-3'). Sample-specific 7-bp barcodes  
407 were incorporated into the primers for multiplex sequencing. The PCR reactions contained 5 µl of  
408 Q5 reaction buffer (5×), 5 µl of Q5 High-Fidelity GC buffer (5×), 0.25 µl of Q5 High-Fidelity  
409 DNA Polymerase (5 U/µl), 2 µl of dNTPs (2.5 mM), 1 µl (10 µM) of each forward and reverse  
410 primer, 2 µl of DNA template, and 8.75 µl of ddH<sub>2</sub>O. Thermal cycling consisted of initial  
411 denaturation at 98°C for 2 min, followed by 25 cycles of denaturation at 98°C for 15 s, annealing  
412 at 55°C for 30 s, and extension at 72°C for 30 s, with a final extension at 72°C for 5 min. PCR  
413 amplicons were purified using Agencourt AMPure Beads (Beckman Coulter, Indianapolis, IN) and  
414 quantified using a PicoGreen dsDNA Assay kit (Invitrogen, Carlsbad, CA, USA). After the  
415 quantification step, amplicons were pooled in equal amounts, and 2 × 300 bp paired-end  
416 sequencing was performed using an Illumina MiSeq platform with the MiSeq Reagent kit v3 at  
417 Shanghai Personal Biotechnology Co., Ltd. (Shanghai, China). The raw data on which the  
418 conclusions of the manuscript rely has been deposited in the National Center for Biotechnology  
419 Information (NCBI) database (accession number SRP139192, SRP139193 and SRP139195).

420     **Analysis of sequencing data.** Data analysis was performed using the Quantitative Insights Into  
421 Microbial Ecology (QIIME, v1.8.0) pipeline (54). Briefly, raw sequencing reads with exact  
422 matches to the barcodes were assigned to respective samples and identified as valid sequences.  
423 The low-quality sequences were filtered based on the following criteria (55, 56): length < 150 bp,

424 average Phred score < 20, ambiguous bases, and mononucleotide repeats > 8 bp. Paired-end reads  
425 were assembled using FLASH (57), and chimera detection was performed with QIIME. After  
426 quality control, four fecal samples were excluded due to low sequence quality that was potentially  
427 caused by a technical artifact. The remaining high-quality sequences were clustered into  
428 operational taxonomic units (OTUs) at a 97% sequence identity using an open-reference OTU  
429 picking protocol against the Greengenes database (58).

430 We focused on open-reference OTU picking for these analyses because this method yields  
431 substantially more taxonomic identifications with sequences that failed to hit the reference  
432 database than do closed-reference methods. The open-reference method can provide more  
433 information for enterotype-like clustering and comparisons among intestinal segments or feces.  
434 The singleton OTUs were discarded because such OTUs can occur due to sequencing errors. Only  
435 OTUs representing more than 0.001% of the total filtered OTUs were retained to improve the  
436 efficiency of the analysis. Because the sequencing and sampling quantity varied among  
437 individuals, we rarefied the data to the lowest sequences per sample to control for sampling effort  
438 in diversity analyses. Alpha and beta diversity of individual OTUs were calculated with  
439 post-rarefaction data and the phylogenetic tree. Principal coordinate analysis (PCoA) was  
440 performed using the unweighted or weighted UniFrac distance (59) for different intestinal  
441 segments and feces.

442 Enterotype-like clustering was performed as previously described (21). In brief, the Calinski–  
443 Harabasz (CH) index was calculated with PAM clustering to determine the optimal number of  
444 clusters (Fig. S1a-e). The silhouette scores were calculated for each cluster to assess the robustness  
445 of the clustering (Fig. S1f). Principal coordinate analysis (PCoA) was implemented with the

446 dudi.pco function using the *ade4* package, and the cluster plots were performed using the *rgl*  
447 packages in **R**. The correlations between the mean fecal and segmental genera abundance were  
448 calculated using the method described in a study of rhesus macaques (32).

449 **Statistical analysis.** We used Mann-Whitney tests to identify overrepresented genera in each  
450 cluster within the same intestinal segment or fecal sample. Because abundant unassigned taxa  
451 were detected that were significantly different in the duodenal, jejunal and ileal clusters,  
452 identification of overrepresented taxa was also implemented at the OTU level in these samples.  
453 ADONIS analyses were performed with 999 permutations for analysis of similarities and  
454 dissimilarities using the *vegan* package in **R**. Venn plots were generated for intestinal segment or  
455 feces samples at the OTU level using the VennDiagram package in **R**. The package *psych* in **R** was  
456 used to calculate Spearman correlations.

457 **Acknowledgements**

458 We thank Prof. Guiyun Xu for the anatomizing demonstration; Guangqi Li, Zhongyi Duan,  
459 Shanshan Xie, Jingwei Yuan, Dehe Wang, Zebin Zhang, Xingzheng Li, Yajie Li, Chunning Mai  
460 and Zhenfei Jiang for assistance with the sample collection; and Dr. Zhengsheng Xue for advice  
461 on the study. The current study was funded in part by Programs for Changjiang Scholars and  
462 Innovative Research in University (IRT\_15R62) and China Agriculture Research System  
463 (CARS-40).

464 WY, JXZ and NY designed the study. WY, JXZ, CLW, CLJ, DXZ, YHC and CJS collected the  
465 samples. WY analyzed the data and wrote the manuscript. CLW assisted in construction of the  
466 figures. CJS and NY assisted in data analyzing and contributed to the revisions. All authors read  
467 and approved the final manuscript.

468

469 **Conflict of Interest**

470 The authors declare no conflicts of interest.



471

472 **REFERENCES**

- 473 1. Rosenbaum M, Knight R, and Leibel RL. 2015. The gut microbiota in human energy homeostasis  
474 and obesity. *Trends in Endocrinology & Metabolism* 26:493.
- 475 2. Shin NR, Lee JC, Lee HY, Kim MS, Whon TW, Lee MS, and Bae JW. 2014. An increase in the  
476 *Akkermansia* spp. population induced by metformin treatment improves glucose homeostasis in  
477 diet-induced obese mice. *Gut*. 63:727-735.
- 478 3. Brisbin JT, Gong J, and Sharif S. 2008. Interactions between commensal bacteria and the  
479 gut-associated immune system of the chicken. *Anim Health Res Rev* 9:101-110.
- 480 4. Lavelle A, Lennon G, O'Sullivan O, Docherty N, Balfe A, Maguire A, Mulcahy HE, Doherty G,  
481 O'Donoghue D, Hyland J, Ross RP, Coffey JC, Sheahan K, Cotter PD, Shanahan F, Winter DC, and  
482 O'Connell PR. 2015. Spatial variation of the colonic microbiota in patients with ulcerative colitis  
483 and control volunteers. *Gut* 64:1553-61.
- 484 5. Gevers D, Kugathasan S, Denson LA, Vázquezbaeza Y, Van TW, Ren B, Schwager E, Knights D,  
485 Song SJ, and Yassour M. 2014. The treatment-naive microbiome in new-onset Crohn's disease. *Cell*  
486 *Host Microbe* 15:382-392.
- 487 6. Dumonceaux TJ, Hill JE, Hemmingsen SM, and Van Kessel AG. 2006. Characterization of  
488 intestinal microbiota and response to dietary virginiamycin supplementation in the broiler chicken.  
489 *Appl Environ Microbiol* 72:2815-2823.
- 490 7. Yeoman CJ, Chia N, Jeraldo P, Sipos M, Goldenfeld ND, and White BA. 2012. The microbiome of  
491 the chicken gastrointestinal tract. *Anim Health Res Rev* 13:89-99.
- 492 8. Stanley D, Hughes RJ, and Moore RJ. 2014. Microbiota of the chicken gastrointestinal tract:  
493 influence on health, productivity and disease. *Appl Microbiol Biotechnol* 98:4301-4310.

- 494 9. Shaufi MAM, Sieo CC, Chong CW, Gan HM, and Ho YW. 2015. Deciphering chicken gut  
495 microbial dynamics based on high-throughput 16S rRNA metagenomics analyses. *Gut Pathog* 7:4.
- 496 10. Clavijo V, and Mjv F. 2018. The gastrointestinal microbiome and its association with the control of  
497 pathogens in broiler chicken production: A review. *Poultry Sci* 97:1006-1021.
- 498 11. Gong J, Si W, Forster R, Huang R, Yu H, Yin Y, and Yang CY. 2007. 16S rRNA gene-based  
499 analysis of mucosa-associated bacterial community and phylogeny in the chicken gastrointestinal  
500 tracts: from crops to ceca. *Fems Microbiol Ecol* 59:147.
- 501 12. Choi JH, Kim GB, and Cha CJ. 2014. Spatial heterogeneity and stability of bacterial community in  
502 the gastrointestinal tracts of broiler chickens. *Poult Sci* 93:1942-1950.
- 503 13. Xiao Y, Xiang Y, Zhou W, Chen J, Li K, and Yang H. 2016. Microbial community mapping in  
504 intestinal tract of broiler chicken. *Poult Sci* 96:1387-1393.
- 505 14. Mead GC. 1989. Microbes of the avian cecum: types present and substrates utilized. *Journal of*  
506 *Experimental Zoology Part A Ecological Genetics & Physiology* 252:48-54.
- 507 15. Clench MH, and Mathias JR. 1995. The Avian Cecum: A Review. *Wilson Bulletin* 107:93-121.
- 508 16. Obst BS, and Diamond JM. 1989. Interspecific variation in sugar and amino acid transport by the  
509 avian cecum. *Journal of Experimental Zoology Part A Ecological Genetics & Physiology*  
510 252:117-126.
- 511 17. Gasaway WC, White RG, and Dan FH. 1976. Digestion of Dry Matter and Absorption of Water in  
512 the Intestine and Cecum of Rock Ptarmigan. *Condor* 78:77-84.
- 513 18. Stanley D, Geier MS, Hughes RJ, Denman SE, and Moore RJ. 2013. Highly variable microbiota  
514 development in the chicken gastrointestinal tract. *Plos One* 8:e84290.
- 515 19. Sergeant MJ, Constantinidou C, Cogan TA, Bedford MR, Penn CW, and Pallen MJ. 2014.

- 516 Extensive Microbial and Functional Diversity within the Chicken Cecal Microbiome. *Plos One*  
517 9:e91941.
- 518 20. Stanley D, Geier MS, Chen H, Hughes RJ, and Moore RJ. 2015. Comparison of fecal and cecal  
519 microbiotas reveals qualitative similarities but quantitative differences. *Bmc Microbiol* 15:1-11.
- 520 21. Arumugam M, Raes J, Pelletier E, Le Paslier D, Yamada T, Mende DR, Fernandes GR, Tap J,  
521 Bruls T, Batto J, Bertalan M, Borruel N, Casellas F, Fernandez L, Gautier L, Hansen T, Hattori M,  
522 Hayashi T, Kleerebezem M, Kurokawa K, Leclerc M, Levenez F, Manichanh C, Nielsen HB,  
523 Nielsen T, Pons N, Poulain J, Qin J, Sicheritz-Ponten T, Tims S, Torrents D, Ugarte E, Zoetendal  
524 EG, Wang J, Guarner F, Pedersen O, de Vos WM, Brunak S, Doré J, MetaHIT C, Weissenbach J,  
525 Ehrlich SD, and Bork P. 2011. Enterotypes of the human gut microbiome. *Nature* 473:174-180.
- 526 22. Mi YL, Rho M, Song YM, Lee K, Sung J, and Ko GP. 2014. Stability of Gut Enterotypes in Korean  
527 Monozygotic Twins and Their Association with Biomarkers and Diet. *Sci Rep-Uk* 4:7348.
- 528 23. Liang C, Tseng HC, Chen HM, Wang WC, Chiu CM, Chang JY, Lu KY, Weng SL, Chang TH, and  
529 Chang CH. 2017. Diversity and enterotype in gut bacterial community of adults in Taiwan. *Bmc*  
530 *Genomics* 18:932.
- 531 24. Wu GD, Chen J, Hoffmann C, Bittinger K, Chen Y, Keilbaugh SA, Bewtra M, Knights D, Walters  
532 WA, Knight R, Sinha R, Gilroy E, Gupta K, Baldassano R, Nessel L, Li H, Bushman FD, and  
533 Lewis JD. 2011. Linking Long-Term Dietary Patterns with Gut Microbial Enterotypes. *Science*  
534 (New York, N.y.) 334:105-108.
- 535 25. Moeller AH, Degnan PH, Pusey AE, Wilson ML, Hahn BH, and Ochman H. 2012. Chimpanzees  
536 and humans harbour compositionally similar gut enterotypes. *Nat Commun* 3:1179.
- 537 26. Wang J, Linnenbrink M, Künzel S, Fernandes R, Nadeau M, Rosenstiel P, and Baines JF. 2014.

- 538 Dietary history contributes to enterotype-like clustering and functional metagenomic content in the  
539 intestinal microbiome of wild mice. *Proceedings of the National Academy of Sciences* 111:E2703.
- 540 27. Kaakoush NO, Sodhi N, Chenu JW, Cox JM, Riordan SM, and Mitchell HM. 2014. The interplay  
541 between *Campylobacter* and *Helicobacter* species and other gastrointestinal microbiota of  
542 commercial broiler chickens. *Gut Pathog* 6:18.
- 543 28. Suzuki TA, and Nachman MW. 2016. Spatial Heterogeneity of Gut Microbial Composition along  
544 the Gastrointestinal Tract in Natural Populations of House Mice. *Plos One* 11:e0163720.
- 545 29. Sekelja M, Rud I, Knutsen SH, Denstadli V, Westereng B, Næs T, and Rudi K. 2012. Abrupt  
546 temporal fluctuations in the chicken fecal microbiota are explained by its gastrointestinal origin.  
547 *Applied & Environmental Microbiology* 78:2941-2948.
- 548 30. Gu S, Chen D, Zhang JN, Lv X, Wang K, Duan LP, Nie Y, and Wu XL. 2013. Bacterial  
549 Community Mapping of the Mouse Gastrointestinal Tract. *Plos One* 8:e74957.
- 550 31. Yan W, Sun C, Yuan J, and Yang N. 2017. Gut metagenomic analysis reveals prominent roles of  
551 *Lactobacillus* and cecal microbiota in chicken feed efficiency. *Sci Rep-Uk* 7:45308.
- 552 32. Yasuda, Koji, Keunyoung, Ren, Boyu, Nbsp T, and Franzosa. 2015. Biogeography of the Intestinal  
553 Mucosal and Luminal Microbiome in the Rhesus Macaque. *Cell Host Microbe* 17:385.
- 554 33. Stearns JC, Lynch MDJ, Senadheera DB, Tenenbaum HC, Goldberg MB, Cvitkovitch DG, Croitoru  
555 K, Morenoghelsieb G, and Neufeld JD. 2011. Bacterial biogeography of the human digestive tract.  
556 *Sci Rep-Uk* 1:170.
- 557 34. Li D, Chen H, Mao B, Yang Q, Zhao J, Gu Z, Zhang H, Chen YQ, and Chen W. 2017. Microbial  
558 Biogeography and Core Microbiota of the Rat Digestive Tract. *Sci Rep-Uk* 8:45840.
- 559 35. Zhao W, Wang Y, Liu S, Huang J, Zhai Z, He C, Ding J, Wang J, Wang H, Fan W, Zhao JG, and

- 560 Meng H. 2015. The dynamic distribution of porcine microbiota across different ages and  
561 gastrointestinal tract segments. *Plos One* 10:e0117441.
- 562 36. Ericsson AC, Johnson PJ, Lopes MA, Perry SC, and Lanter HR. 2016. A Microbiological Map of  
563 the Healthy Equine Gastrointestinal Tract. *Plos One* 11:e0166523.
- 564 37. Waite DW, and Taylor MW. 2014. Characterizing the avian gut microbiota: membership, driving  
565 influences, and potential function. *Front Microbiol* 5:223.
- 566 38. Wienemann T, Schmitt-Wagner D, Meuser K, Segelbacher G, Schink B, Brune A, and Berthold P.  
567 2011. The bacterial microbiota in the ceca of Capercaillie (*Tetrao urogallus*) differs between wild  
568 and captive birds. *Systematic & Applied Microbiology* 34:542-551.
- 569 39. Matsui H, Kato Y, Chikaraishi T, Moritani M, Bantokuda T, and Wakita M. 2010. Microbial  
570 diversity in ostrich ceca as revealed by 16S ribosomal RNA gene clone library and detection of  
571 novel *Fibrobacter* species. *Anaerobe* 16:83.
- 572 40. Oakley BB, Lillehoj HS, Kogut MH, Kim WK, Maurer JJ, Pedroso A, Lee MD, Collett SR,  
573 Johnson TJ, and Cox NA. 2014. The chicken gastrointestinal microbiome. *Fems Microbiol Lett*  
574 360:100-112.
- 575 41. Wei S, Morrison M, and Yu Z. 2013. Bacterial census of poultry intestinal microbiome. *Poultry Sci*  
576 92:671-683.
- 577 42. Tillman GE, Haas GJ, Wise MG, Oakley B, Smith MA, and Siragusa GR. 2011. Chicken intestine  
578 microbiota following the administration of lupulone, a hop-based antimicrobial. *Fems Microbiol*  
579 *Ecol* 77:395-403.
- 580 43. Cressman MD, Yu Z, Nelson MC, Moeller SJ, Lilburn MS, and Zerby HN. 2010. Interrelations  
581 between the Microbiotas in the Litter and in the Intestines of Commercial Broiler Chickens.

- 582 Applied & Environmental Microbiology 76:6572-6582.
- 583 44. Clench MH, and Mathias JR. 1992. A complex avian intestinal motility response to fasting.  
584 American Journal of Physiology 262:498-504.
- 585 45. Costea PI, Hildebrand F, Manimozhiyan A, Bäckhed F, Blaser MJ, Bushman FD, De Vos WM,  
586 Ehrlich SD, Fraser CM, Hattori M, Huttenhower C, Jeffery IB, Knights D, Lewis JD, Ley RE,  
587 Ochman H, O'Toole PW, Quince C, Relman DA, Shanahan F, Sunagawa S, Wang J, Weinstock  
588 GM, Wu GD, Zeller G, Zhao L, Raes J, Knight R, and Bork P. 2018. Enterotypes in the landscape  
589 of gut microbial community composition. Nat Microbiol 3:8.
- 590 46. Ramayo-Caldas Y, Mach N, Lepage P, Levenez F, Denis C, Lemonnier G, Leplat JJ, Billon Y,  
591 Berri M, Doré J, Rogel-Gaillard C, and Estelle J. 2016. Phylogenetic network analysis applied to  
592 pig gut microbiota identifies an ecosystem structure linked with growth traits. Isme J 10:2973.
- 593 47. Pauwels J, Taminau B, Janssens GPJ, Beenhouwer MD, Delhalle L, Daube G, and Coopman F.  
594 2015. Cecal drop reflects the chickens' cecal microbiome, fecal drop does not. J Microbiol Meth  
595 117:164.
- 596 48. Garcia-Mazcorro JF, Castillo-Carranza SA, Guard B, Gomez-Vazquez JP, Dowd SE, and  
597 Brighsmith DJ. 2016. Comprehensive Molecular Characterization of Bacterial Communities in  
598 Feces of Pet Birds Using 16S Marker Sequencing. Microb Ecol:1-12.
- 599 49. Claesson MJ, Jeffery IB, Conde S, Power SE, O'Connor EM, Cusack S, Harris HM, Coakley M,  
600 Lakshminarayanan B, and O'Sullivan O. 2012. Gut microbiota composition correlates with diet and  
601 health in the elderly. Nature 488:178-184.
- 602 50. Clarke SF, Murphy EF, O'Sullivan O, Lucey AJ, Humphreys M, Hogan A, Hayes P, O'Reilly M,  
603 Jeffery IB, and Woodmartin R. 2014. Exercise and associated dietary extremes impact on gut

- 604 microbial diversity. *Gut* 63:1913.
- 605 51. Clauss W, Dantzer V, and Skadhauge E. 1991. Aldosterone modulates electrogenic Cl secretion in  
606 the colon of the hen (*Gallus domesticus*). *Am J Physiol* 261:1533-41.
- 607 52. Smith CC, Snowberg LK, Gregory CJ, Knight R, and Bolnick DI. 2015. Dietary input of microbes  
608 and host genetic variation shape among-population differences in stickleback gut microbiota. *Isme J*  
609 9:2515.
- 610 53. Zhao LL, Wang G, Siegel P, He C, Wang HZ, Zhao WJ, Zhai ZX, Tian FW, Zhao JX, Zhang H,  
611 Sun Z, Chen W, Zhang Y, and Meng H. 2013. Quantitative Genetic Background of the Host  
612 Influences Gut Microbiomes in Chickens. *Sci Rep-Uk* 3:1163.
- 613 54. Caporaso JG, Kuczynski J, Stombaugh J, Bittinger K, Bushman FD, Costello EK, Fierer N, Peña  
614 AG, Goodrich JK, and Gordon JI. 2010. QIIME allows analysis of high-throughput community  
615 sequencing data. *Nat Methods* 7:335.
- 616 55. Gill SR, Pop M, Deboy RT, Eckburg PB, Turnbaugh PJ, Samuel BS, Gordon JI, Relman DA,  
617 Fraserliggett CM, and Nelson KE. 2006. Metagenomic Analysis of the Human Distal Gut  
618 Microbiome. *Science* 312:1355-1359.
- 619 56. Chen H, and Jiang W. 2014. Application of high-throughput sequencing in understanding human  
620 oral microbiome related with health and disease. *Front Microbiol* 5:508.
- 621 57. Magoč T, and Salzberg SL. 2011. FLASH: fast length adjustment of short reads to improve genome  
622 assemblies. *Bioinformatics* 27:2957-2963.
- 623 58. Desantis TZ, Hugenholtz P, Larsen N, Rojas M, Brodie EL, Keller K, Huber T, Dalevi D, Hu P, and  
624 Andersen GL. 2006. Greengenes, a chimera-checked 16S rRNA gene database and workbench  
625 compatible with ARB. *Applied & Environmental Microbiology* 72:5069-72.

626 59. Lozupone C, and Knight R. 2005. UniFrac: a new phylogenetic method for comparing microbial

627 communities. *Applied & Environmental Microbiology* 71:8228.

628



629

**Table 1** Shared and exclusive OTUs between two of sampling sites

| Site1          | Site2 | Shared OTUs        |             | Exclusive OTUs |             |
|----------------|-------|--------------------|-------------|----------------|-------------|
|                |       | In site1, %        | In site2, % | In site1, %    | In site2, % |
| D <sup>1</sup> | J     | 95.03 <sup>2</sup> | 96.00       | 4.97           | 4.00        |
|                |       | 99.95 <sup>3</sup> | 99.96       | 0.05           | 0.04        |
| D              | I     | 98.57              | 89.77       | 1.43           | 10.23       |
|                |       | 99.90              | 99.80       | 0.10           | 0.20        |
| J              | I     | 98.78              | 89.05       | 1.22           | 10.95       |
|                |       | 99.93              | 99.81       | 0.07           | 0.19        |
| C              | D     | 82.71              | 65.79       | 17.29          | 34.21       |
|                |       | 97.16              | 43.13       | 2.84           | 56.87       |
| C              | J     | 81.38              | 65.40       | 18.62          | 34.60       |
|                |       | 96.27              | 48.30       | 3.73           | 51.70       |
| C              | I     | 95.31              | 69.05       | 4.69           | 30.95       |
|                |       | 99.58              | 59.14       | 0.42           | 40.86       |
| F              | D     | 86.81              | 94.20       | 13.19          | 5.80        |
|                |       | 99.51              | 98.78       | 0.49           | 1.22        |
| F              | J     | 85.83              | 94.10       | 14.17          | 5.90        |
|                |       | 99.49              | 99.05       | 0.51           | 0.95        |

|   |   |       |        |       |       |
|---|---|-------|--------|-------|-------|
|   |   | 95.94 | 94.82  | 4.06  | 5.18  |
| F | I |       |        |       |       |
|   |   | 99.65 | 98.84  | 0.35  | 1.16  |
|   |   |       |        |       |       |
|   |   | 72.99 | 99.57  | 27.01 | 0.43  |
| F | C |       |        |       |       |
|   |   | 99.12 | >99.99 | 0.88  | <0.01 |

---

630 <sup>1</sup>D, J, I, C and F denoted the microbial community of duodenum, jejunum, ileum,  
631 cecum and feces, respectively. <sup>2</sup>The percentage of shared or exclusive OTUs; <sup>3</sup>The  
632 percentage of sequence reads shared or exclusive OTUs represented.

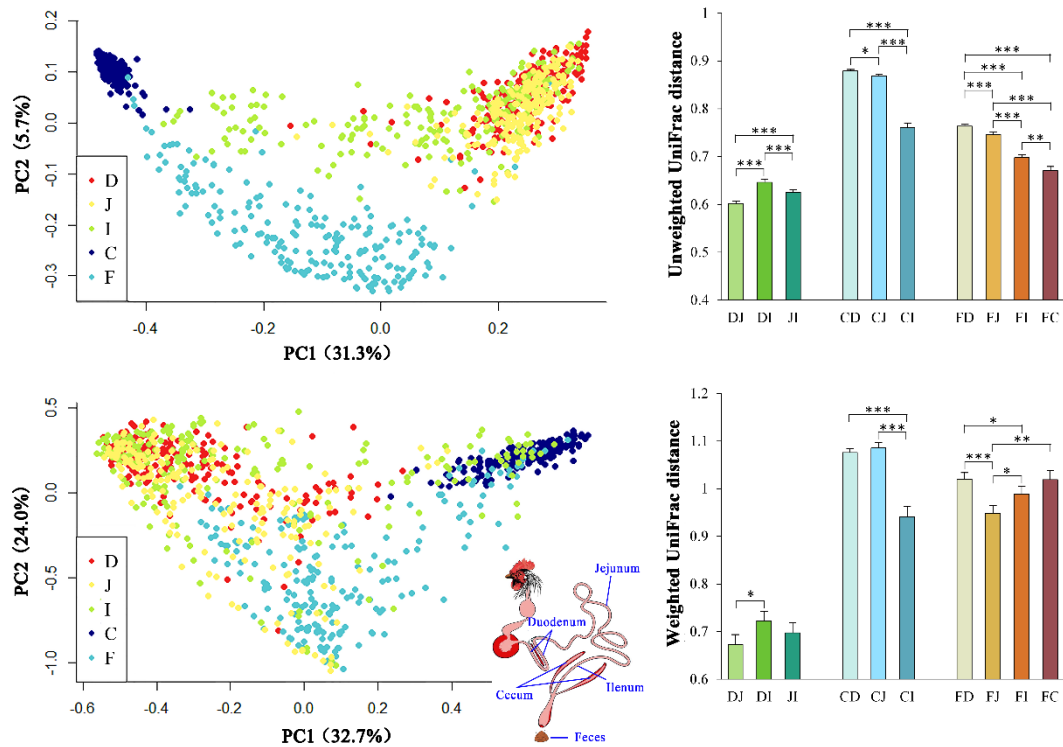

633

634 **FIG 1** Site origin and inter-individual effects on the shape of microbial community membership

635 and structure. **(a)** Principal coordinates analysis (PCoA) with unweighted UniFrac distance. Each

636 dot represents a sample from a duodenum (D), jejunum (J), ileum (I), cecum (C) or feces (F). PC1

637 and PC2 represent the top two principal coordinates that captured the most variation, with the

638 fraction of variation captured by that coordinate shown as a percent. **(b)** Unweighted UniFrac

639 distance (mean  $\pm$  SEM) between two sampling sites. DJ represents the UniFrac distance between

640 the duodenal and jejunal microbial community, and it was the same as DI, JI, CD, CJ, CI, FD, FJ,

641 FI and FC. Asterisks indicate the significance of the paired *t*-test: \*\*\**P* < 0.001, \*\**P* < 0.01, and \**P*

642 < 0.05. **(c)** PCoA plot with weighted UniFrac distance, similar to **(a)**. **(d)** Weighted UniFrac

643 distance between two sampling sites, similar to **(b)**.

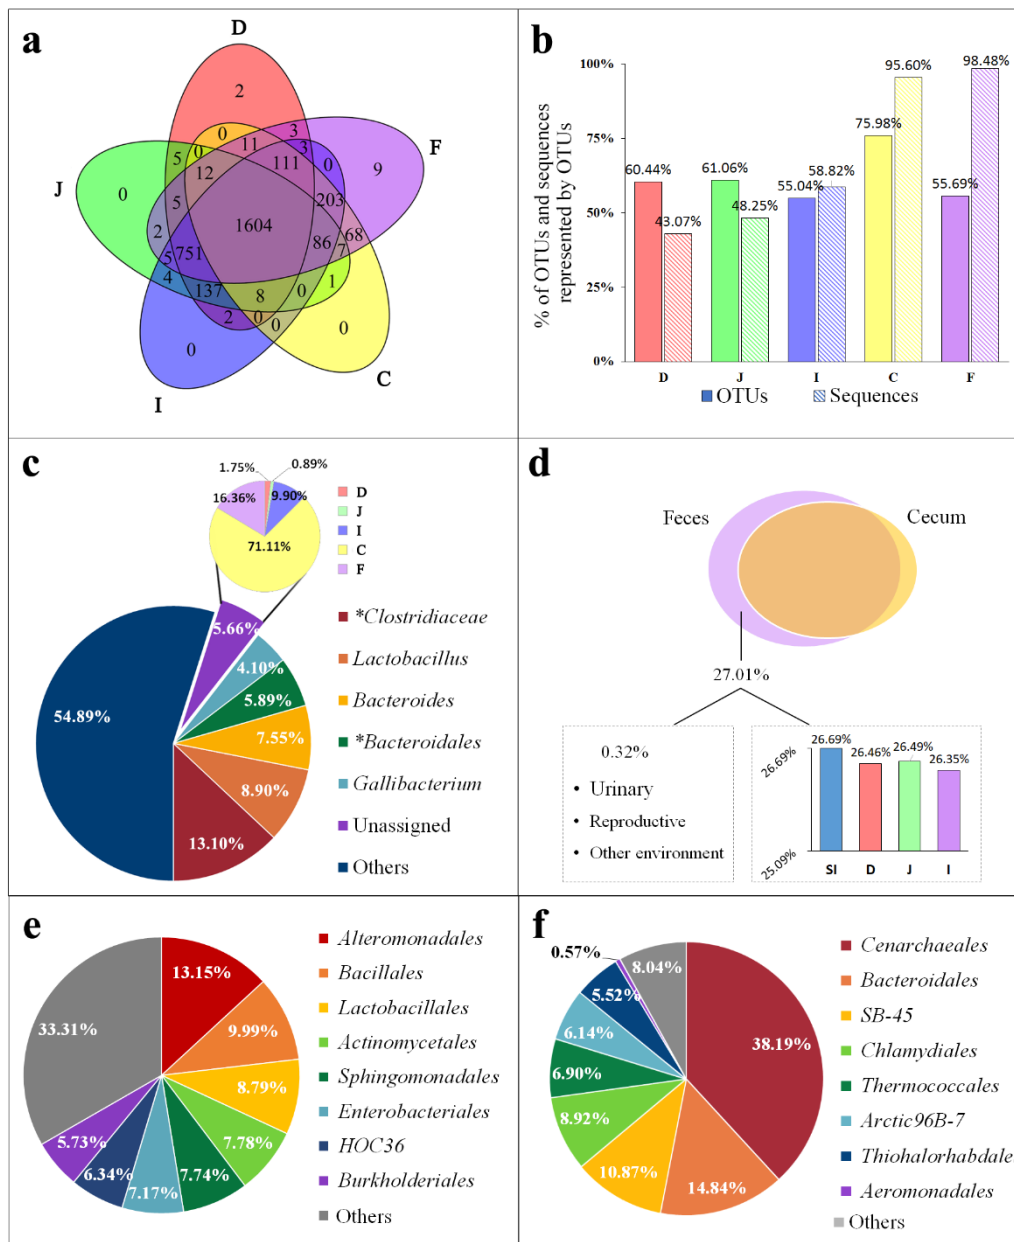

644

645 **FIG 2** OTUs shared across different sampling sites. (a) Venn diagram demonstrating that the  
 646 taxa overlap among different sampling sites. D, J, I, C and F denote the microbial communities of  
 647 the duodenum, jejunum, ileum, cecum and feces, respectively. (b) The percentage of core OTUs  
 648 and sequences represented by these OTUs in the duodenal, jejunal, ileal, cecal and fecal samples.  
 649 (c), related to (b). The dominant taxa of the core microbiota. The sequences of unassigned taxa are  
 650 partitioned to different sampling sites (duodenum, jejunum, ileum, ceca and feces) shown in the

651 small pie chart. **(d)** The percentage of OTUs in feces exclusively contributed by the small intestine,  
652 and the percentage of OTUs in feces was below the limit of detection in the gastrointestinal tract.  
653 SI = the microbial community in small intestine. Taxa exclusively shared between feces and small  
654 intestine **(e)** or ceca **(f)** are shown at the order level. Each section in the pies **(c, e and f)** indicate  
655 the percentage of sequences represented by the corresponding taxon in the core taxa **(c)** or  
656 exclusively shared taxa **(e and f)**.

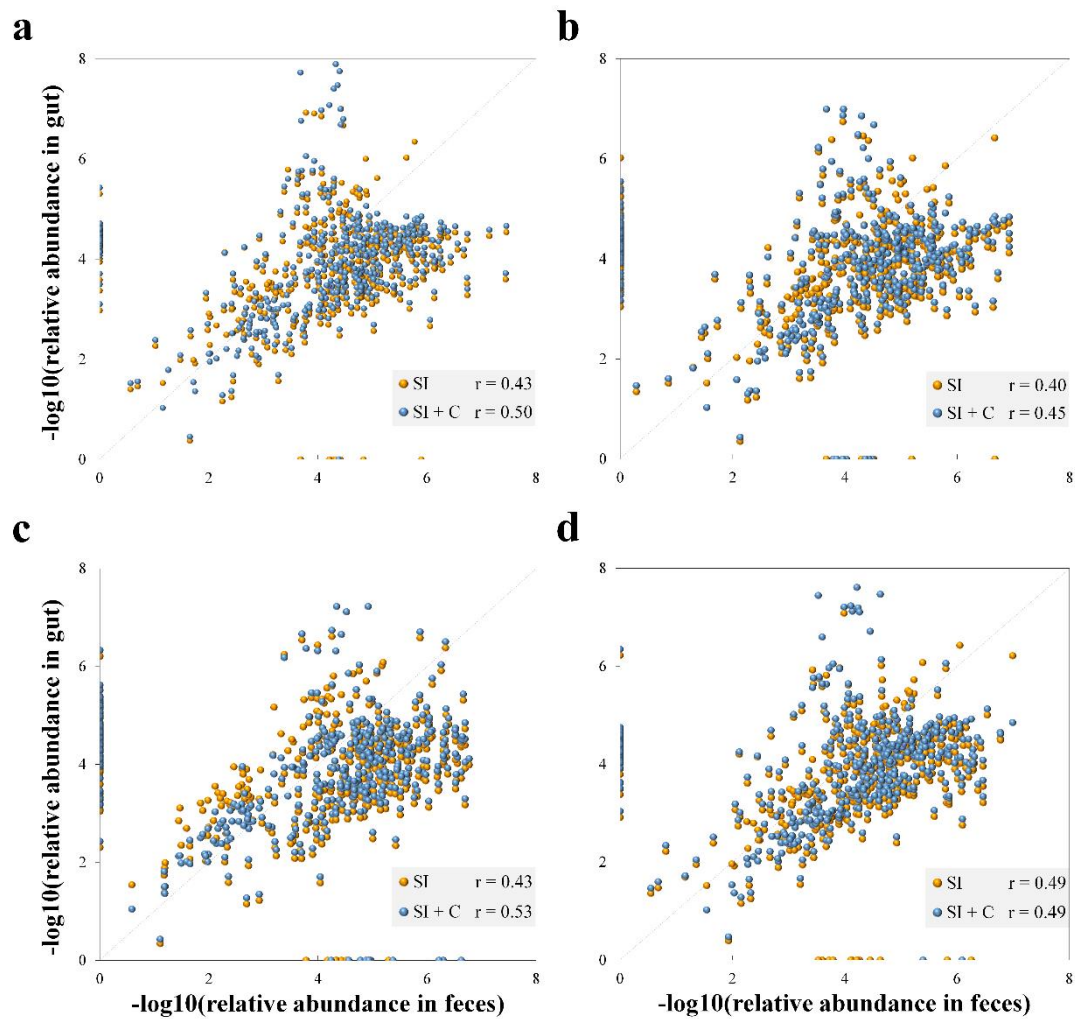

657

658 **FIG 3** Microbial compositions in feces mirror those in the gastrointestinal tract. Each dot  
659 represents the average relative abundance of a genus across all individuals (a), individuals in fecal  
660 enterotype-like cluster 1 (b), individuals in fecal enterotype-like cluster 2 (c) and individuals in  
661 fecal enterotype-like cluster 3 (d) for each region (feces at the x-axis; SI: small intestine or SI + C:  
662 intestine including small intestine and ceca at the y-axis). Spearman's rho was calculated between  
663 fecal and SI (or SI + C) negative logarithm-transferred relative abundances. All Spearman  
664 correlations shown are significant ( $P < 0.05$ ).

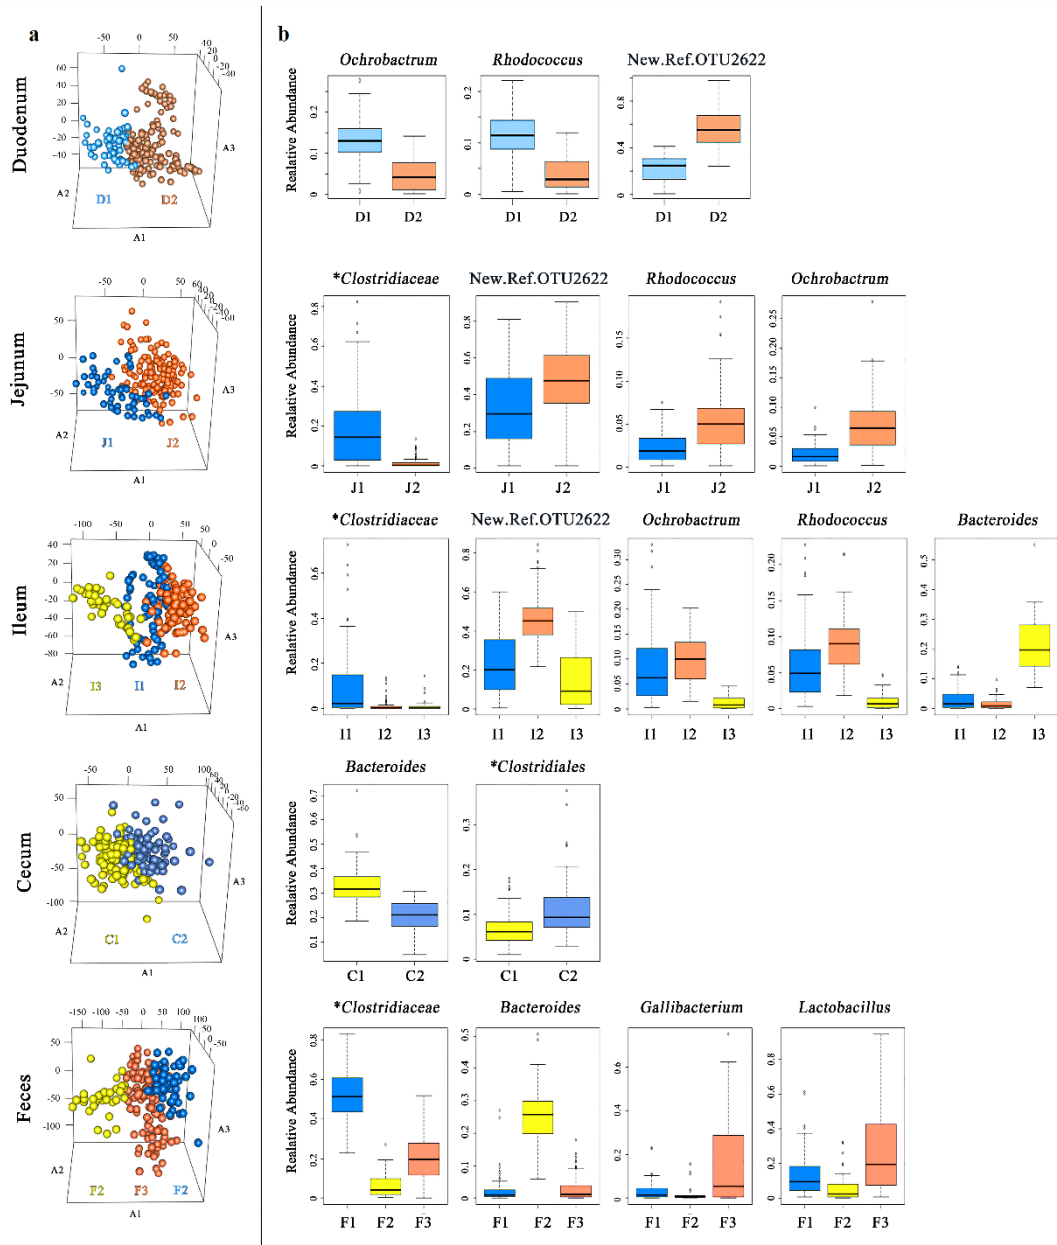

665

666 **FIG 4** Enterotype-like clusters in different sites. **(a)** Analyses of enterotype-like clustering with  
 667 the partitioning around medoid (PAM) clustering algorithm, which visualizes results from PCoA  
 668 and clustering at the OTU level using a 97% similarity threshold. **(b)** Relative abundances of  
 669 overrepresented taxa of each enterotype. D, J, I, C and F denote the microbial communities of the  
 670 duodenum, jejunum, ileum, cecum and feces, respectively. The numbers following D, J, I, C and F  
 671 represent enterotype-like cluster 1, 2 or 3. Unclassified genera under a higher rank are marked by  
 672 asterisks.

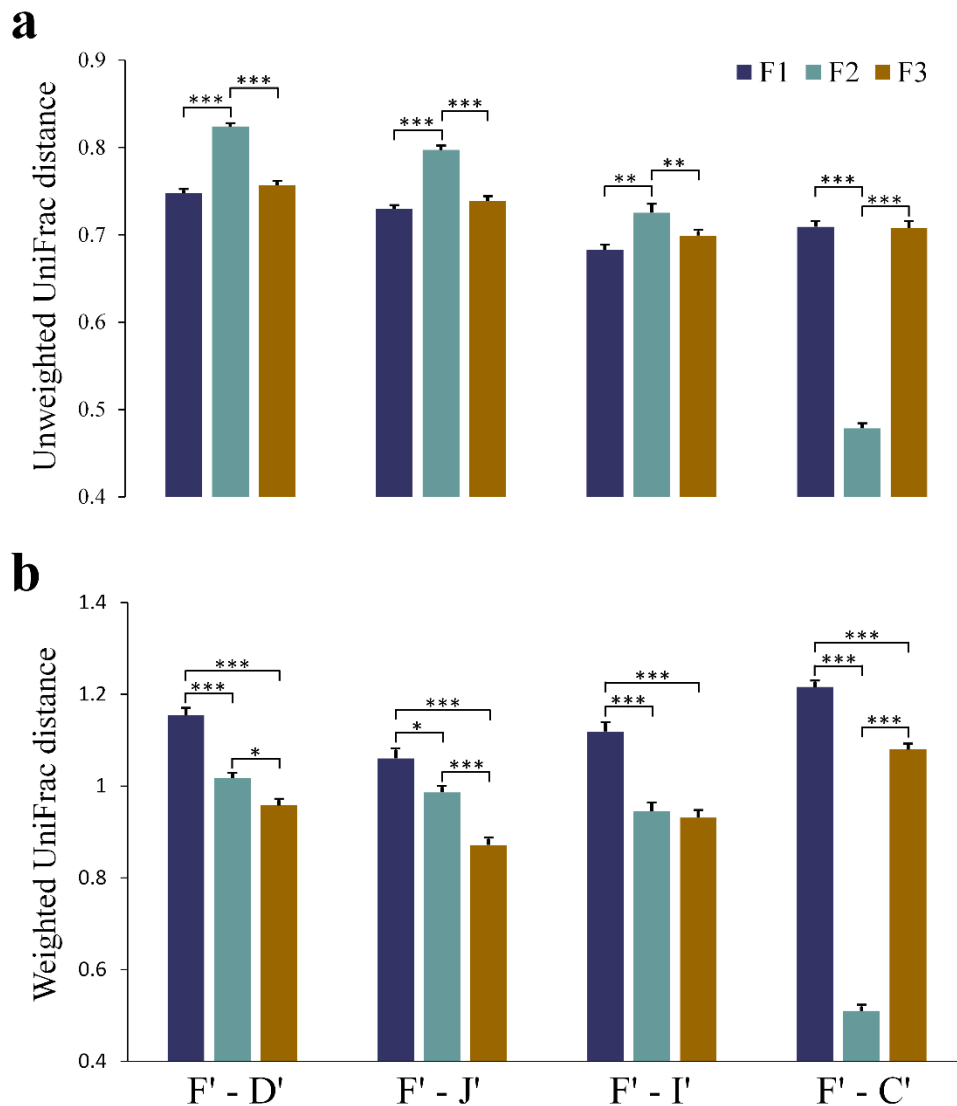

673

674 **FIG 5** Enterotype-like clustering affects microbial relationships between fecal and

675 gastrointestinal samples. Unweighted (**a**) and weighted (**b**) UniFrac distance (mean  $\pm$  SEM)

676 between fecal and each of the four segmental samples in different fecal enterotype-like clusters.

677 F1, F2 and F3 denote fecal enterotype-like clusters 1, 2 and 3. D', J', I', C' and F' represent the

678 duodenal, jejunal, ileal, cecal and fecal samples, respectively, in corresponding fecal

679 enterotype-like clusters. Asterisks indicate the significance of the paired *t*-test: \*\*\**P* < 0.001, \*\**P* <

680 0.01, and \**P* < 0.05.
